# Supplementary material
Source: publisher figshare collection journal article supplement (https://frontiersin.figshare.com/ndownloader/files/13644071)
Supplement: Supplementary file 1 [file 13644071]

***Supplementary Material I***

**Re-building Communities: Voluntary Resettlement from Wildlife Reserves in India**

**Authors**: Krithi K. Karanth*, Sahila Kudalkar, Shivangi Jain

*** Correspondence:** Krithi K. Karanth, [krithi.karanth@cwsorg.in](mailto:krithi.karanth@cwsorg.in)

SI.a: Variables used in models for frequently reported reasons that households wanted to move out of a reserve

| **Demographic predictors** | |
| --- | --- |
| hhsize | Number of members in the household |
| hhedu | Average number of years adults from the household have been educated |
| hhmale | Percentage of adult men in the household |
| numchild | Number of children in the household |
| hhage | Average age of all members of a household |
| **Economic predictors** | |
| hhincamt1 | Average annual income of a household |
| agrper | Percentage contribution of agriculture to total annual household income |
| ntfpper | Percentage contribution of non-timber forest products (NTFP) to total annual household income |
| wlper | Percentage contribution of wage labor to total annual household income |
| lvslost | Binary variable (1 if livestock lost to carnivores in the past decade) |
| eduexp | Household's annual expenditure on education |
| illexp | Household's annual expenditure on healthcare |
| **Health predictor** | |
| illdays | Average number of days an adult member (man/woman) was sick in the previous year |
| **Awareness predictors** | |
| landawr | Binary variable (1 if respondent is aware about post-relocation land provision) |
| schlawr | Binary variable (1 if respondent is aware about post-relocation school provision) |
| awr | Binary variable (1 if respondent is aware about > 4 post-relocation provisions) |
| **Random effect** | |
| vil | Village |

SI.b: List of predictions and predictors associated with top-ranked reasons reported by households for moving out of a reserve

| **Predictions** | **Reserve** | **Predictors** |
| --- | --- | --- |
| **Do you want to move?** | | |
| Agriculture alone determines whether a household wants to move out | Tadoba | landawr + agrland + agrper + hhincamt + (1|vil) |
| Both agriculture and demographics determine whether a household wants to move out | agrland + numchild + hhsize + hhedu + landawr + agrper + hhincamt+ (1|vil) |
| **Human-wildlife conflict** | | |
| Households rank human-wildlife conflict as the top reason to move based upon their vulnerability defined by demographic factors | Tadoba | hhsize + hhmale + landawr2 + (1|vil) |
| Wayanad | hhsize + hhmale + (1|vil) |
| Nagarahole |
| Households rank human-wildlife conflict as the top reason to move based upon their economic vulnerability | Tadoba | agrper3+ hhincamt + lvslost + (1|vil) |
| Wayanad |
| Nagarahole4 | hhincamt + lvslost + (1|vil) |
| Households rank human-wildlife conflict as the top reason to move based upon their vulnerability defined by demographic and economic factors | Tadoba | hhsize + hhmale + landawr + agrper+ hhincamt + lvslost + (1|vil) |
| Wayanad | hhsize + hhmale + agrper+ hhincamt + lvslost + (1|vil) |
| Nagarahole | hhsize + hhmale + hhincamt + lvslost + (1|vil) |
| **NTCA Package** | | |
| Demographics, and awareness about post-relocation variables will determine whether a household ranks NTCA package as the primary reason to move | Nagarahole | numchild + hhedu + awr + (1|vil) |
| Economic variables alone will determine whether a household ranks NTCA package as the primary reason to move | agrland + hhincamt + eduexp + illexp + (1|vil) |
| Demographic, economic and awareness variables together will determine whether a household ranks NTCA package as the primary reason to move | numchild + hhedu + awr + agrland + hhincamt + eduexp + illexp + (1|vil) |
| **Agriculture** | | |
| Agriculture is chosen as the top reason to move based upon agriculture-related economic conditions | Tadoba | agrland + hhincamt + hhsize + agrper + (1|vil) |
| Agriculture is chosen as the top reason to move based upon access to agricultural inputs | asset + fertmkt + hhincamt + hhsize + (1|vil) |
| Agriculture is chosen as the top reason to move based upon awareness of post-relocation land provisions | landawr + hhincamt + hhsize + (1|vil) |
| Agriculture is chosen as the top reason to move based upon agriculture-related economic conditions, access to agricultural inputs, and awareness of post-relocation land provisions | agrper + agrland + landawr + asset + hhincamt + fertmkt + hhsize + (1|vil) |
| **Education** | | |
| Households’ rank education as the top reason to move based upon anticipation of better facilities post-relocation | Tadoba | hhedu + numchild + schlawr + hhincamt + (1|vil) |
| Households’ rank education as the top reason to move based upon difficulties faced in the current scenario | hhedu + eduexp + hhincamt + (1|vil) |
| Households’ rank education as the top reason to move based upon both anticipation of the future and current difficulties faced | hhedu + numchild + schlawr + eduexp + hhincamt + (1|vil) |
| **Healthcare** | | |
| Households’ rank healthcare as the top reason to move based upon anticipation of better facilities post-relocation | Kawal | hhincamt + hhmale + numchild + (1|vil) |
| Households’ rank healthcare as the top reason to move based upon difficulties faced in the current scenario | illamt + illdays + hhincamt + ntfpper + hhmale + numchild + (1|vil) |
| **Roads** | | |
| Households’ rank roads as the top reason to move based upon anticipation of better facilities post-relocation | Kawal | hhage + hhedu + (1|vil) |
| Households’ rank roads as the top reason to move based upon difficulties faced in the current scenario | illexp + hhmale + hhage + ntfpper + (1|vil) |
| Households’ rank roads as the top reason to move based upon both anticipation of the future and current difficulties faced | hhedu + hhage + hhmale + eduexp + illexp + hhincamt + ntfpper + hhsize + (1|vil) |

1 Average annual household income was reclassified into ordinal levels based upon the income structure of households in each reserve

Tadoba: 1: [US $0 – US $232), 2: [US $232 – US $7760)

Kawal: 1: [US $0 – US $776), 2: [US $776 – US $1552), 3: [US $1552 – US $7760)

Wayanad: 1: [US $0 – US $776), 2: [$776 – US $7760)

Nagarahole: 1: [US $0 – US $776), 2: [US $1552 – US $7760)

2 > 95% households at Wayanad and Nagarahole were aware about post-relocation provisions, hence the binary predictor awareness about agricultural land provision was tested only at Tadoba

3 1% of households at Nagarahole were agriculturalists prior to relocation, hence the predictor percent contribution of agriculture to annual income was not considered for the reserve

5 Only ⅝ villages were used as random effects in the analysis at Nagarahole, owing to sampling size constraints
